# Supplementary material for: Self-doped polyaniline derived from poly(2-methoxyaniline-5-phosphonic acid) and didodecyldimethylammonium salt
Source: Royal Society of Chemistry journal article supplement (doi:10.1039/c5ra18468a), 2016-01-01
Supplement: c5ra18468a1.pdf [file c5ra18468a1.pdf]

## Supplementary Information

### Self-doped polyaniline derived from poly(2-methoxyaniline-5-phosphonic acid) and didodecyldimethylammonium salt

Toru Amaya,\* Ryosuke Sugihara, Dai Hata, and Toshikazu Hirao\*

#### Calculation of the composition

The structure of the obtained mixture in the experiment can be drawn as shown in Fig. S1.

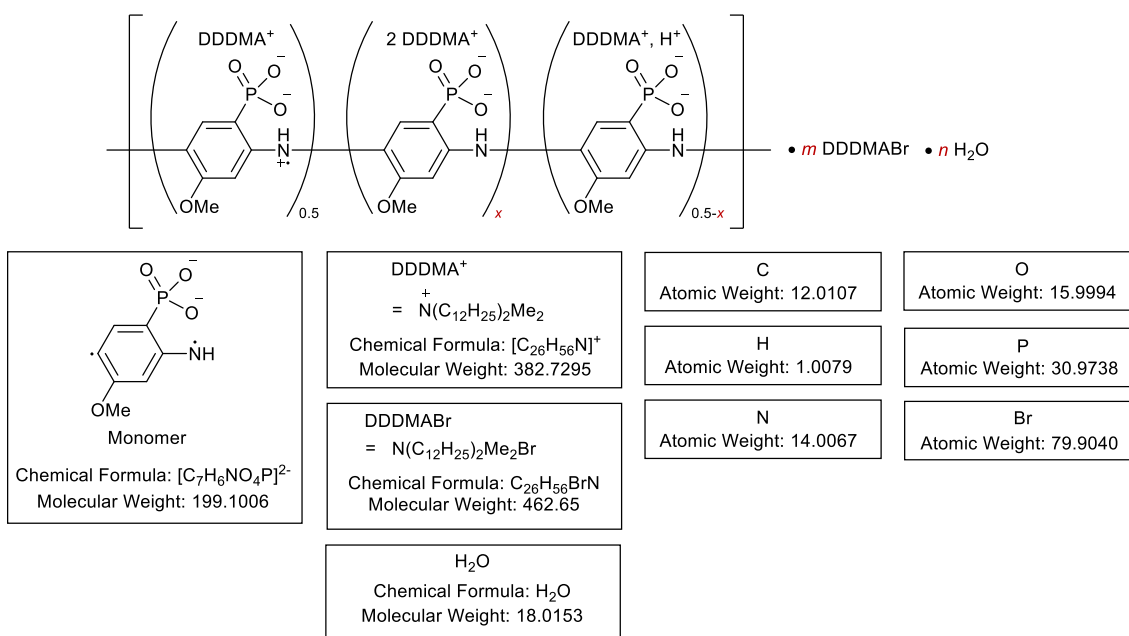

**Fig. S1.** Structure of the mixture.

Here, W(Atom or Molecule) means the percentage of weight (wt%) for “Atom or Molecule” in the above mixture.  $M_w$ (Molecule) and  $A_w$ (Atom) mean molecular weight and atomic weight for “Molecule” and “Atom”, respectively.

#### PMAP-DDDMA before washing

$W(P) = [1.75 \cdot (20/1000)] / 1.9068 \cdot 100 = 1.835$  wt%, the value of ppm for phosphorus was obtained from the ICP-AES analysis [1.75 ppm (average number of the three experiments) in the concentrated nitric acid solution of the above mixture (1.9068 mg in 20 mL)].

W(Br) = 8.76 wt%, the value was obtained from the ion-chromatography.

W(O) = 100 - {W(C)+W(H)+W(N)+W(Br)+W(P)} = 8.68 wt%, the values for W(C), W(H) and W(N) were obtained from the elementary analysis {W(C), W(H) and W(N) = 65.58, 11.88 and 3.70 wt%, respectively}.

$$m = \{W(\text{DDDMABr})/M_w(\text{DDDMABr})\} / \{W(\text{P})/A_w(\text{P})\} = 1.85, \text{ where } W(\text{DDDMABr}) = W(\text{Br}) * M_w(\text{DDDMABr}) / A_w(\text{Br})$$

$$M_w(\text{all}) = M_w(\text{monomer}) + (1+x) * M_w(\text{DDDMA}^+) + (0.5-x) * A_w(\text{H}^+) + m * M_w(\text{DDDMABr}) + n * M_w(\text{H}_2\text{O})$$

W(O) = 100 \* {4 \* A\_w(O) + n \* A\_w(O)} / M\_w(all), because oxygen is included in the components for monomer and H<sub>2</sub>O in the above mixture.

$$W(\text{P}) = 100 * A_w(\text{P}) / M_w(\text{all})$$

From the above two equations concerning the percentage of weight for oxygen and phosphorous,  $x$  and  $n$  were calculated.

$$\text{i.e. } M_w(\text{all}) = 100 * A_w(\text{P}) / W(\text{P})$$

$$n = \{W(\text{O}) * M_w(\text{all}) - 100 * 4 * A_w(\text{O})\} / (100 * A_w(\text{O})) = \{W(\text{O}) * 100 * A_w(\text{P}) / W(\text{P}) - 100 * 4 * A_w(\text{O})\} / (100 * A_w(\text{O}))$$

$$= 4.70$$

$$x =$$

$$\{M_w(\text{all}) - M_w(\text{monomer}) - M_w(\text{DDDMA}^+) - 0.5 * A_w(\text{H}^+) - m * M_w(\text{DDDMABr}) - n * M_w(\text{H}_2\text{O})\} / \{M_w(\text{DDDMA}^+) - A_w(\text{H}^+)\} = \{100 * A_w(\text{P}) / W(\text{P}) - M_w(\text{monomer}) - M_w(\text{DDDMA}^+) - 0.5 * A_w(\text{H}^+) - m * M_w(\text{DDDMABr}) - n * M_w(\text{H}_2\text{O})\} / \{M_w(\text{DDDMA}^+) - A_w(\text{H}^+)\}$$

$$= 0.431$$

Therefore, molecular formula of the above mixture is described as shown below.

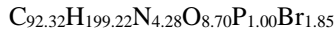

The percentage of weight for each element is described as shown below (elementary analysis).

C, 65.71; H, 11.90; N, 3.55

Cf. the experimental values: C, 65.58; H, 11.88; N, 3.70.

### PMAP-DDDMA after washing

W(P) = [3.50 \* (20/1000)] / 2.1865 \* 100 = 3.20 wt%, the value of ppm for phosphorus was obtained from the ICP-AES analysis [3.50 ppm (average number of the three experiments) in the concentrated nitric acid solution of the above mixture (2.1865 mg in 20 mL)].

W(Br) = 5.43 wt%, the value was obtained from the ion-chromatography.

$W(O) = 100 - \{W(C) + W(H) + W(N) + W(Br) + W(P)\} = 11.74 \text{ wt\%}$ , the values for  $W(C)$ ,  $W(H)$  and  $W(N)$  were obtained from the elementary analysis  $\{W(C), W(H), \text{ and } W(N) = 64.38, 11.16 \text{ and } 4.09 \text{ wt\%}$ , respectively}.

The values for  $m$ ,  $n$  and  $x$  were calculated in the same way as **PMAP-DDDMA before washing**.

$m = 0.66$ ,  $n = 3.10$  and  $x = 0.0660$

Therefore, molecular formula of the above mixture is described as shown below.

$C_{51.81}H_{109.14}N_{2.72}O_{7.10}P_{1.00}Br_{0.66}$

The percentage of weight for each element is described as shown below (elementary analysis).

C, 64.32; H, 11.37; N, 3.94

*Cf.* the experimental values: C, 64.38; H, 11.16; N, 4.09.

(a)

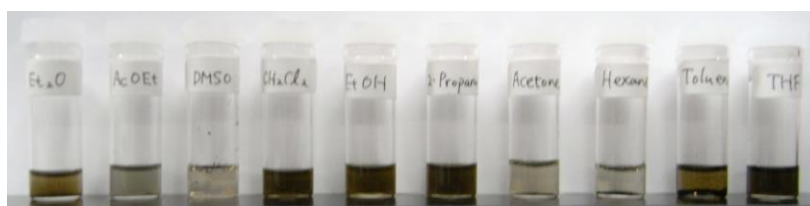

(b)

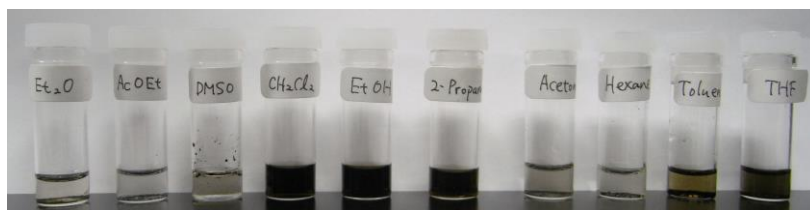

**Fig. S2** Pictures of PMAP-DDDMA (a) before and (b) after washing in various solvents (from left to right, diethyl ether, ethyl acetate, DMSO,  $CH_2Cl_2$ , ethanol, 2-propanol, acetone, hexane, toluene and THF ).

PMAP-DDDMA before washing

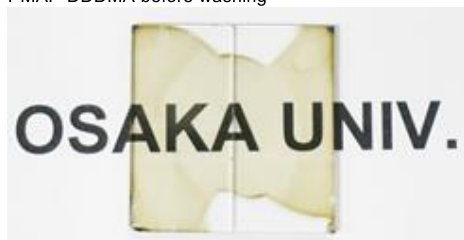

Thickness: 293 nm  
Transmittance at 455 nm: 79%

PMAP-DDDMA after washing

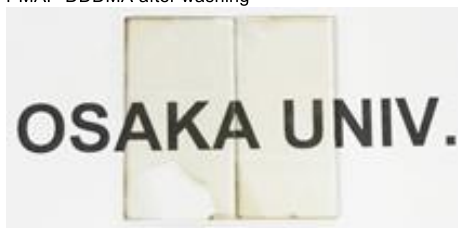

Thickness: 337 nm  
Transmittance at 455 nm: 65%

**Fig. S3** Photos of spin-coated film of PMAP-DDDMA before (left) and after (right) washing on glass substrates.
